# Supplementary material
Source: HighWire-hosted journal article supplement (https://bmjopen.bmj.com/content/10/12/e032570)
Supplement: inline-supplementary-material-2 [file inline-supplementary-material-2.pdf]

**Search strategies for  
Apps vs no apps  
Preliminary searches performed 23 April 2019**

**Total number of records identified: 4494 records**  
**Number of duplicates excluded: 743 records**  
**Number of records in final list: 3751 records**

**Cochrane Central Register of Controlled Trials (CENTRAL) in the Cochrane Library (2019, Issue 4) (546 hits)**

- #1 MeSH descriptor: [Obesity] explode all trees
- #2 MeSH descriptor: [Hyperphagia] explode all trees
- #3 MeSH descriptor: [Body Mass Index] explode all trees
- #4 MeSH descriptor: [Weight Gain] explode all trees
- #5 MeSH descriptor: [Weight Loss] explode all trees
- #6 MeSH descriptor: [Anti-Obesity Agents] 1 tree(s) exploded
- #7 (Pickwick\* syndrom\* or Prader willi syndrom\* or obes\* or adipos\* or overweight\* or 'over weight\*' or overeat\* or 'over eat\*' or 'over feed\*' or overfeed\* or binge eating disorder\* or 'fat overload' syndrom\* or (weight and (gain or cycling or reduc\* or loss or losing or maint\* or decreas\* or watch\* or diet\* or control\*))) .ti,ab
- #8 #1 or #2 or #3 or #4 or #5 or #6 or #7
- #9 MeSH descriptor: [Mobile Applications] explode all trees
- #10 ((mobile or smartphone or telephone or virtual or digital or wellness or medical or dietary or physical activity or intervention or treatment or weight or calorie) and (app or coach or tracker))
- #11 (m\*health or mobile health or p\*health or personal health or 'in touch' or txt2bfit or pegaso or fitbit or collective intelligence or 'move it' or myfitnesspal)
- #12 #9 or #10 or #11
- #13 #8 and #12

**MEDLINE Ovid (1946 to April 2019) (510 hits)**

- 1. exp Obesity/
- 2. exp Hyperphagia/
- 3. exp body mass index/
- 4. exp Weight Gain/
- 5. exp Weight Loss/
- 6. exp Anti-Obesity Agents/
- 7. (Pickwick\* syndrom\* or Prader willi syndrom\* or obes\* or adipos\* or overweight\* or 'over weight\*' or overeat\* or 'over eat\*' or 'over feed\*' or overfeed\* or binge eating disorder\* or 'fat overload' syndrom\* or (weight and (gain or cycling or reduc\* or loss or losing or maint\* or decreas\* or watch\* or diet\* or control\*))) .ti,ab.
- 8. 1 or 2 or 3 or 4 or 5 or 6 or 7
- 9. exp Mobile Applications/
- 10. ((mobile or smartphone or telephone or virtual or digital or wellness or medical or dietary or physical activity or intervention or treatment or weight or calorie) and (app or coach or tracker)).mp. [mp=title, abstract, original title, name of substance word, subject heading word, floating sub-heading word, keyword heading word, organism supplementary concept word, protocol supplementary concept word, rare disease supplementary concept word, unique identifier, synonyms]
- 11. (m\*health or mobile health or p\*health or personal health or 'in touch' or txt2bfit or pegaso or fitbit or collective intelligence or 'move it' or myfitnesspal).mp. [mp=title, abstract, original title, name of substance word, subject heading word, floating sub-heading word, keyword heading word, organism supplementary concept word, protocol supplementary concept word, rare disease supplementary concept word, unique identifier, synonyms]
- 12. 9 or 10 or 11
- 13. 8 and 12
- 14. (random\* or blind\* or placebo\* or meta-analys\*).mp. [mp=title, abstract, original title, name of substance word, subject heading word, floating sub-heading word, keyword heading word, organism supplementary concept word, protocol supplementary concept word, rare disease supplementary concept word, unique identifier, synonyms]
- 15. 13 and 14

**Embase Ovid (1974 to April 2019) (802 hits)**

- 1. exp obesity/
- 2. exp hyperphagia/

3. exp body mass/
4. exp body weight gain/
5. exp body weight loss/
6. exp antiobesity agent/
7. (Pickwick\* syndrom\* or Prader willi syndrom\* or obes\* or adipos\* or overweight\* or 'over weight\*' or overeat\* or 'over eat\*' or 'over feed\*' or overfeed\* or binge eating disorder\* or 'fat overload' syndrom\* or (weight and (gain or cycling or reduc\* or loss or losing or maint\* or decreas\* or watch\* or diet\* or control\*)))ti,ab.
8. 1 or 2 or 3 or 4 or 5 or 6 or 7
9. exp mobile application/
10. ((mobile or smartphone or telephone or virtual or digital or wellness or medical or dietary or physical activity or intervention or treatment or weight or calorie) and (app or coach or tracker)).mp. [mp=title, abstract, heading word, drug trade name, original title, device manufacturer, drug manufacturer, device trade name, keyword, floating subheading word, candidate term word]
11. (m\*health or mobile health or p\*health or personal health or 'in touch' or txt2bfit or pegaso or fitbit or collective intelligence or 'move it' or myfitnesspal).mp. [mp=title, abstract, heading word, drug trade name, original title, device manufacturer, drug manufacturer, device trade name, keyword, floating subheading word, candidate term word]
12. 9 or 10 or 11
13. 8 and 12
14. (random\* or blind\* or placebo\* or meta-analys\*).mp. [mp=title, abstract, heading word, drug trade name, original title, device manufacturer, drug manufacturer, device trade name, keyword, floating subheading word, candidate term word]
15. 13 and 14

#### **LILACS (Bireme; 1982 to April 2019) (24 hits)**

(Pickwick\$ syndrom\$ or Prader willi syndrom\$ or obes\$ or adipos\$ or overweight\$ or 'over weight\$' or overeat\$ or 'over eat\$' or 'over feed\$' or overfeed\$ or binge eating disorder\$ or 'fat overload' syndrom\$ or (weight and (gain or cycling or reduc\$ or loss or losing or maint\$ or decreas\$ or watch\$ or diet\$ or control\$))) [Words] and (((mobile or smartphone or telephone or virtual or digital or wellness or medical or dietary or physical activity or intervention or treatment or weight or calorie) and (app or coach or tracker)) or (m\$health or mobile health or p\$health or personal health or 'in touch' or txt2bfit or pegaso or fitbit or collective intelligence or 'move it' or myfitnesspal)) [Words]

**Science Citation Index Expanded (SCI-EXPANDED) (1900 to April 2019), Social Sciences Citation Index (SSCI) (1956 to April 2019), Arts & Humanities Citation Index (A&HCI) (1975 to April 2019), Conference Proceedings Citation Index- Science (CPCI-S) (1990- April 2019), Conference Proceedings Citation Index- Social Science & Humanities (CPCI-SSH) (1990- April 2019), Emerging Sources Citation Index (ESCI) (2015 to April 2019), Web of Science Core Collection: Chemical Indexes Current Chemical Reactions (CCR-EXPANDED) (1986 to April 2019), Index Chemicus (IC) (1993 to April 2019) (Web of Science) (2612 hits)**

#7 #6 AND #5

#6 TS=(random\* or blind\* or placebo\* or meta-analys\*)

#5 #4 AND #1

#4 #3 OR #2

#3 TS=(m\*health or mobile health or p\*health or personal health or 'in touch' or txt2bfit or pegaso or fitbit or collective intelligence or 'move it' or myfitnesspal)

#2 TS=((mobile or smartphone or telephone or virtual or digital or wellness or medical or dietary or physical activity or intervention or treatment or weight or calorie) and (app or coach or tracker))

#1 TS=(Pickwick\* syndrom\* or Prader willi syndrom\* or obes\* or adipos\* or overweight\* or 'over weight\*' or overeat\* or 'over eat\*' or 'over feed\*' or overfeed\* or binge eating disorder\* or 'fat overload' syndrom\* or (weight and (gain or cycling or reduc\* or loss or losing or maint\* or decreas\* or watch\* or diet\* or control\*)))
